# Supplementary material for: RNA-seq data reveals a coordinated regulation mechanism of multigenes involved in the high accumulation of palmitoleic acid and oil in sea buckthorn berry pulp
Source: BMC Plant Biol. 2019 May 20;19:207. doi: 10.1186/s12870-019-1815-x (PMC6528223; doi:10.1186/s12870-019-1815-x)
Supplement: Supplementary file 2 — Table S2. FA composition in sea buckthorn berry pulp from lines ‘Za56’ and ‘TF2–36’ at four developmental stages. (XLSX 13 kb) [file 12870_2019_1815_MOESM2_ESM.xlsx]

## Sheet: Sheet1
Table S2. FA composition in sea buckthorn berry pulp from lines ‘Za56’ and ‘TF2-36’ at four developmental stages.
Lines	Fatty acid composition	Developmental stages
		S1	S2	S3	S4
Za56	Myristic acid (C14:0)	0.53±0.05	0.48±0.04	0.74±0.12	1.52±0.02
	Pentadecanoic acid (C15:0)	0.23±0.02	0.08±0.02	0.10±0.01	0.12±0.02
	Palmitic acid (C16:0)	20.18±0.14	26.98±0.31	30.21±0.16	29.65±0.40
	Palmitoleic acid (C16:1n7)	13.31±0.56	38.31±0.18	41.16±1.59	41.30±1.10
	Hexadecadienoic acid (C16:2)	0.17±0.02	1.44±0.16	1.45±0.05	1.77±0.02
	Stearic acid (C18:0)	2.36±0.17	1.04±0.09	0.95±0.06	0.87±0.09
	Oleic acid (C18:1n9)	12.35±0.44	3.68±0.12	3.32±0.12	1.98±0.05
	Vaccenic acid (C18:1n7)	10.53±0.28	8.47±0.14	7.42±0.34	7.34±0.21
	Linoleic acid (C18:2n6)	24.78±0.37	14.79±0.08	12.01±0.66	12.05±0.37
	Linolenic acid (C18:3n3)	14.67±0.43	4.51±0.07	2.42±0.23	3.13±0.34
	Arachidic acid (C20:0)	0.89±0.03	0.20±0.07	0.23±0.03	0.26±0.02
	Saturated fatty acids (SFA)	24.20±0.30	28.79±0.35	32.22±0.33	32.42±0.38
	Monounsaturated fatty acid (MUFA)	36.19±0.86	50.46±0.13	51.91±1.21	50.63±0.85
	Polyunsaturated fatty acid (PUFA)	39.62±0.62	20.75±0.22	15.87±0.90	16.96±0.69
	Total unsaturated fatty acid (TUFA)	75.80±0.30	71.21±0.35	67.78±0.33	67.58±0.38
	MUFA/SFA	1.50±0.06	1.76±0.03	1.61±0.06	1.56±0.04
	PUFA/SFA	1.64±0.02	0.72±0.02	0.49±0.02	0.52±0.02
	C18:2/C18:3	1.69±0.05	3.28±0.05	4.98±0.21	3.87±0.30
TF2-36	Palmitic acid (C16:0)	25.07±0.34	39.22±0.65	37.88±0.34	36.10±0.23
	Palmitoleic acid (C16:1n7)	12.57±2.85	32.59±0.49	36.93±1.03	39.03±0.42
	Stearic acid (C18:0)	1.48±0.13	0.86±0.21	0.81±0.14	0.78±0.03
	Oleic acid (C18:1n9)	19.92±3.00	14.72±0.30	11.51±1.09	9.60±0.36
	Vaccenic acid (C18:1n7)	6.69±1.55	5.32±0.34	6.19±0.12	7.05±0.27
	Linoleic acid (C18:2n6)	25.53±3.77	6.30±0.38	6.09±0.49	7.15±0.52
	Linolenic acid (C18:3n3)	8.74±1.40	0.98±0.18	0.60±0.08	0.33±0.08
	Saturated fatty acids (SFA)	26.55±0.32	40.09±0.71	38.68±0.40	36.88±0.26
	Monounsaturated fatty acid (MUFA)	39.17±4.83	52.63±0.36	54.62±0.14	55.68±0.29
	Polyunsaturated fatty acid (PUFA)	34.28±5.00	7.28±0.43	6.69±0.53	7.48±0.43
	Total unsaturated fatty acid (TUFA)	73.45±0.32	59.91±0.71	61.32±0.40	63.16±0.26
	MUFA/SFA	1.47±0.17	1.31±0.03	1.41±0.01	1.51±0.01
	PUFA/SFA	1.29±0.20	0.18±0.02	0.17±0.01	0.20±0.02
	C18:2/C18:3	2.93±0.26	6.58±1.15	10.17±1.15	22.44±5.57
